# Supplementary material for: Compact film fabrication of porous coordination polymer Co3[Co(CN)6]2 and its reversible vapochromic behavior
Source: Royal Society of Chemistry journal article supplement (doi:10.1039/c6dt01612j), 2016-01-01
Supplement: c6dt01612j2.pdf [file c6dt01612j2.pdf]

## Electronic Supporting Information

### Contents

Fig. S1: EDX analysis for the powdered sample of  $\text{Co}_3[\text{Co}(\text{CN})_6]_2$ .

Fig. S2: SEM images of the as-prepared  $\text{Co}_3[\text{Co}(\text{CN})_6]_2$  sample at different magnifications.

Fig.S3: SEM photos of discontinuous  $\text{Co}_3[\text{Co}(\text{CN})_6]_2$  film grown on non-woven fabrics substrate with assembly for (a) 40 (b) 80 (c) 120 (d) 160 cycles.

Fig.S4: (a) SEM photos of discontinuous  $\text{Co}_3[\text{Co}(\text{CN})_6]_2$  film grown on silicon wafer substrate with assembly for 160 cycles and (b) PXRD profiles at the selected assembly circles.

Fig.S5: (a) SEM photos of compact  $\text{Co}_3[\text{Co}(\text{CN})_6]_2$  film grown on porous  $\alpha$ -alumina substrate with assembly for 40 cycles and (b) corresponding PXRD profile (the red 'X' marked diffractions arise from  $\text{Co}_3[\text{Co}(\text{CN})_6]_2$  and other diffractions originates from the  $\alpha$ -alumina).

Fig. S6: The truncated cube-shaped particles of  $\text{Co}_3[\text{Co}(\text{CN})_6]_2$  on the surface of ITO glass.

Fig. S7: XPS of (a) whole spectrum (b) C 1s (c) N 1s (d) Co 2p in  $\text{Co}_3[\text{Co}(\text{CN})_6]_2$ .

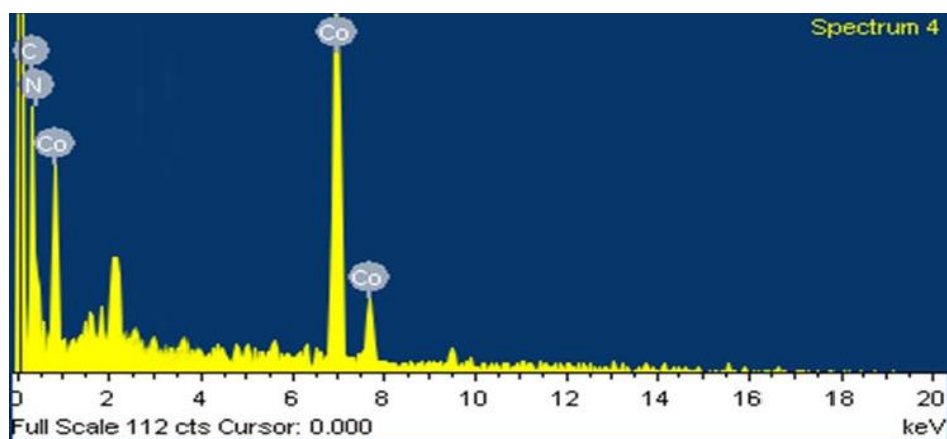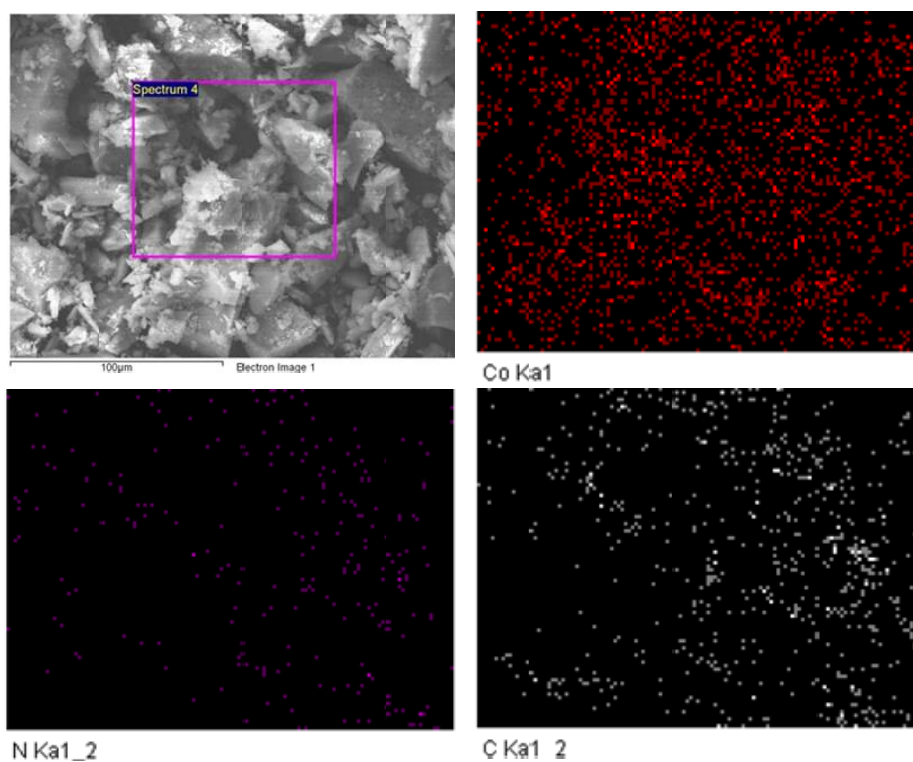

Fig. S1: EDX analysis for the powdered sample of  $\text{Co}_3[\text{Co}(\text{CN})_6]_2$ .

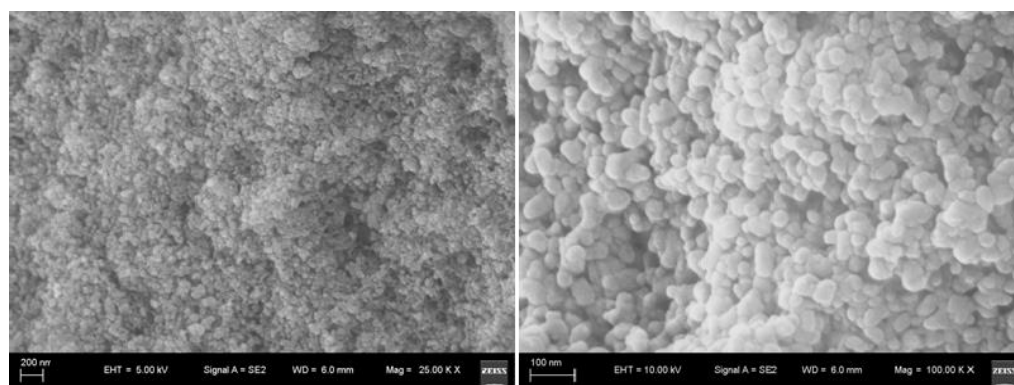

Fig. S2: SEM images of the as-prepared  $\text{Co}_3[\text{Co}(\text{CN})_6]_2$  sample at different magnifications.

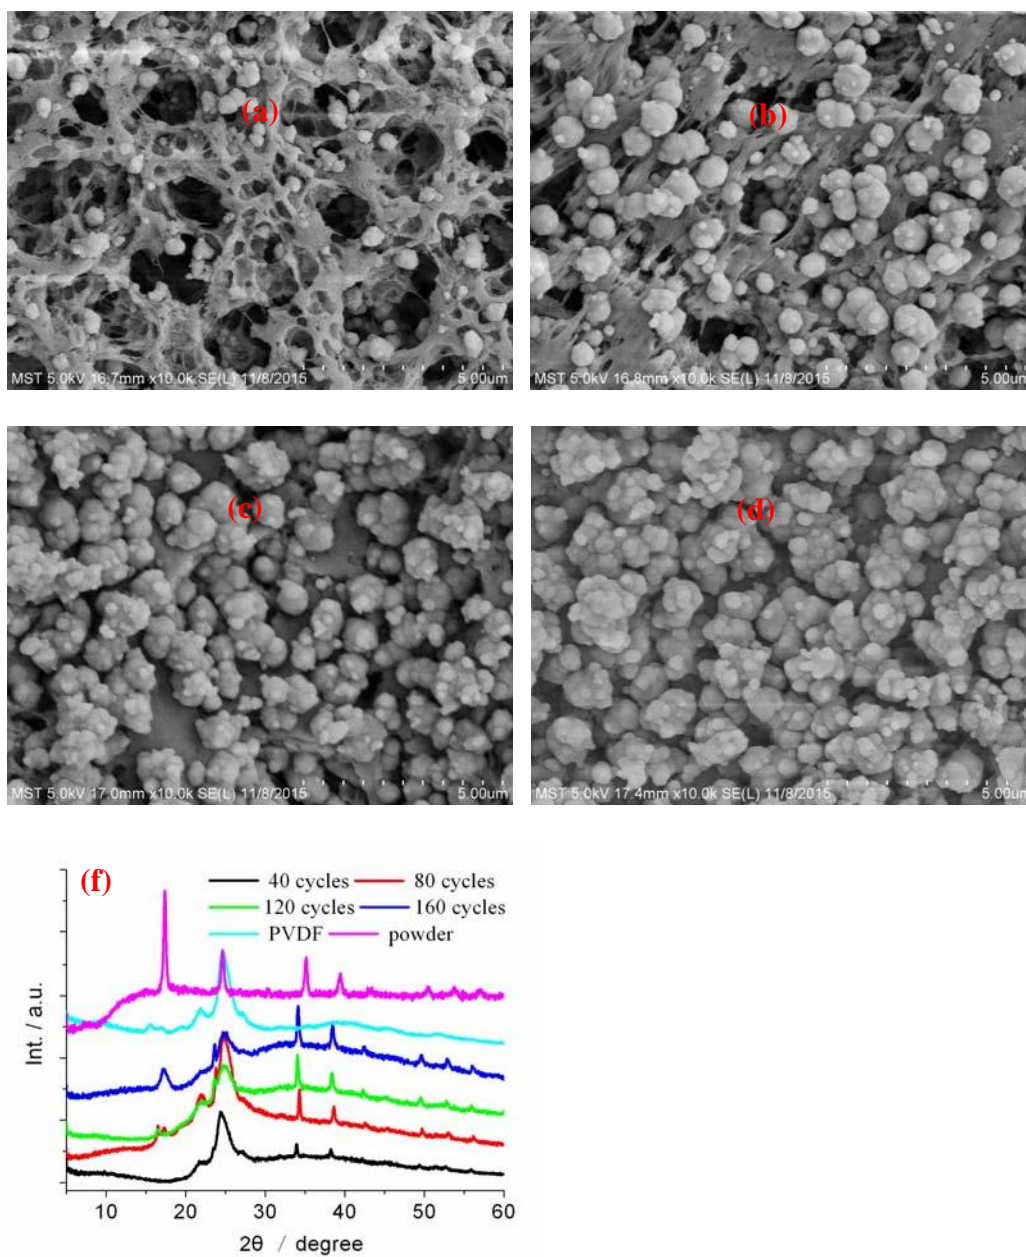

Fig.S3: SEM photos of discontinuous  $\text{Co}_3[\text{Co}(\text{CN})_6]_2$  film grown on non-woven fabrics substrate with assembly for (a) 40 (b) 80 (c) 120 (d) 160 cycles (e) PXRD profiles.

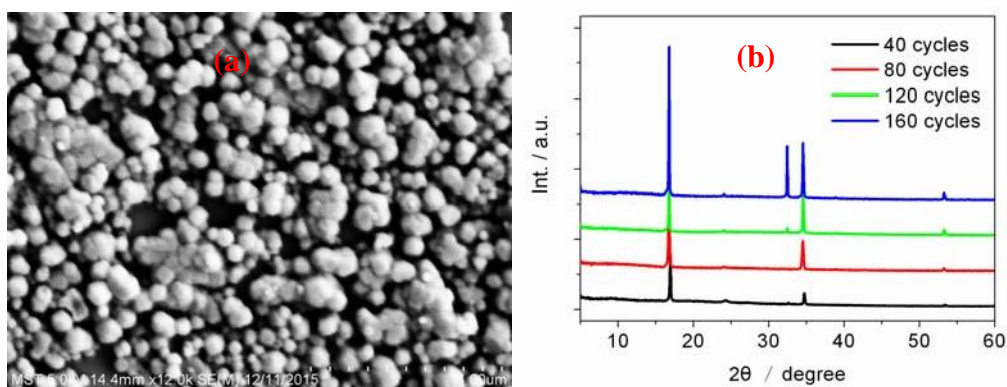

Fig.S4: (a) SEM photos of discontinuous  $\text{Co}_3[\text{Co}(\text{CN})_6]_2$  film grown on silicon wafer substrate with assembly for 160 cycles and (b) PXRD profiles at the selected assembly circles.

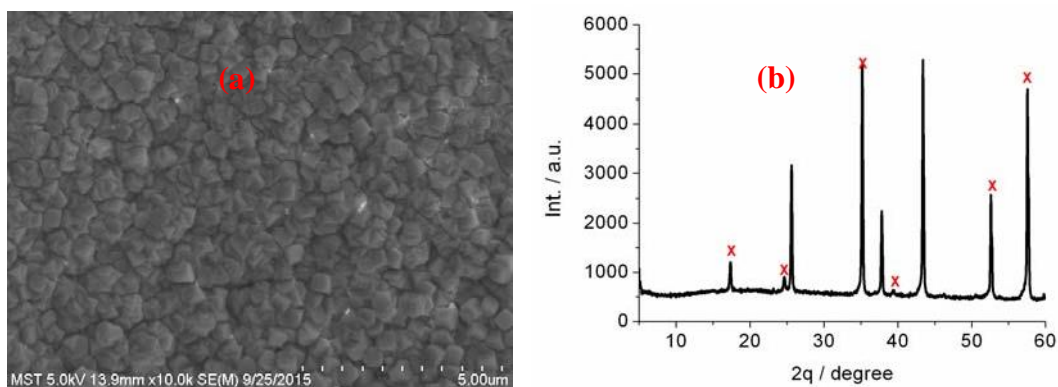

Fig.S5: (a) SEM photos of compact  $\text{Co}_3[\text{Co}(\text{CN})_6]_2$  film grown on porous  $\alpha$ -alumina substrate with assembly for 40 cycles and (b) corresponding PXRD profile (the red 'X' marked diffractions arise from  $\text{Co}_3[\text{Co}(\text{CN})_6]_2$  and other diffractions originates from the  $\alpha$ -alumina).

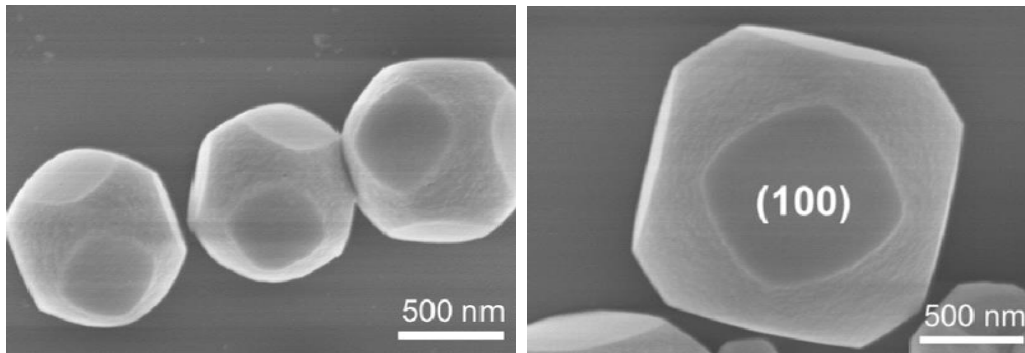

Fig. S6: The truncated cube-shaped particles of  $\text{Co}_3[\text{Co}(\text{CN})_6]_2$  on the surface of ITO glass.

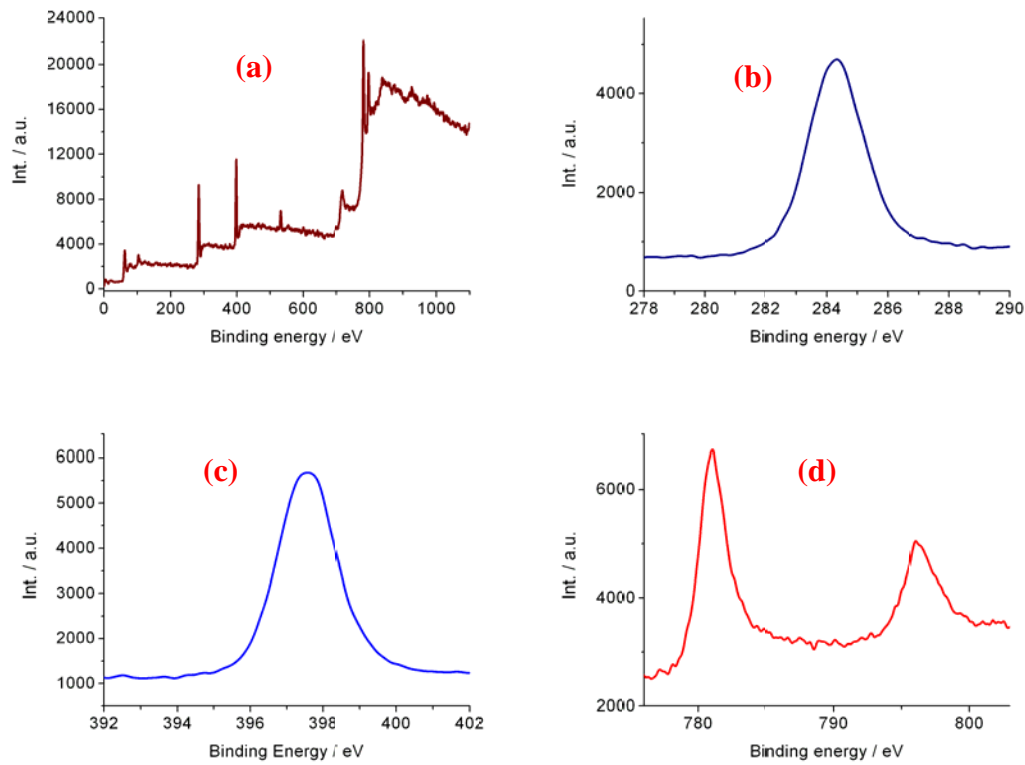

Fig. S7: XPS of (a) whole spectrum (b) C 1s (c) N 1s (d) Co 2p in  $\text{Co}_3[\text{Co}(\text{CN})_6]_2$ .
